# Supplementary material
Source: MDPI journal article supplement (https://www.mdpi.com/2071-1050/9/7/1208)
Supplement: s1 [file s1]

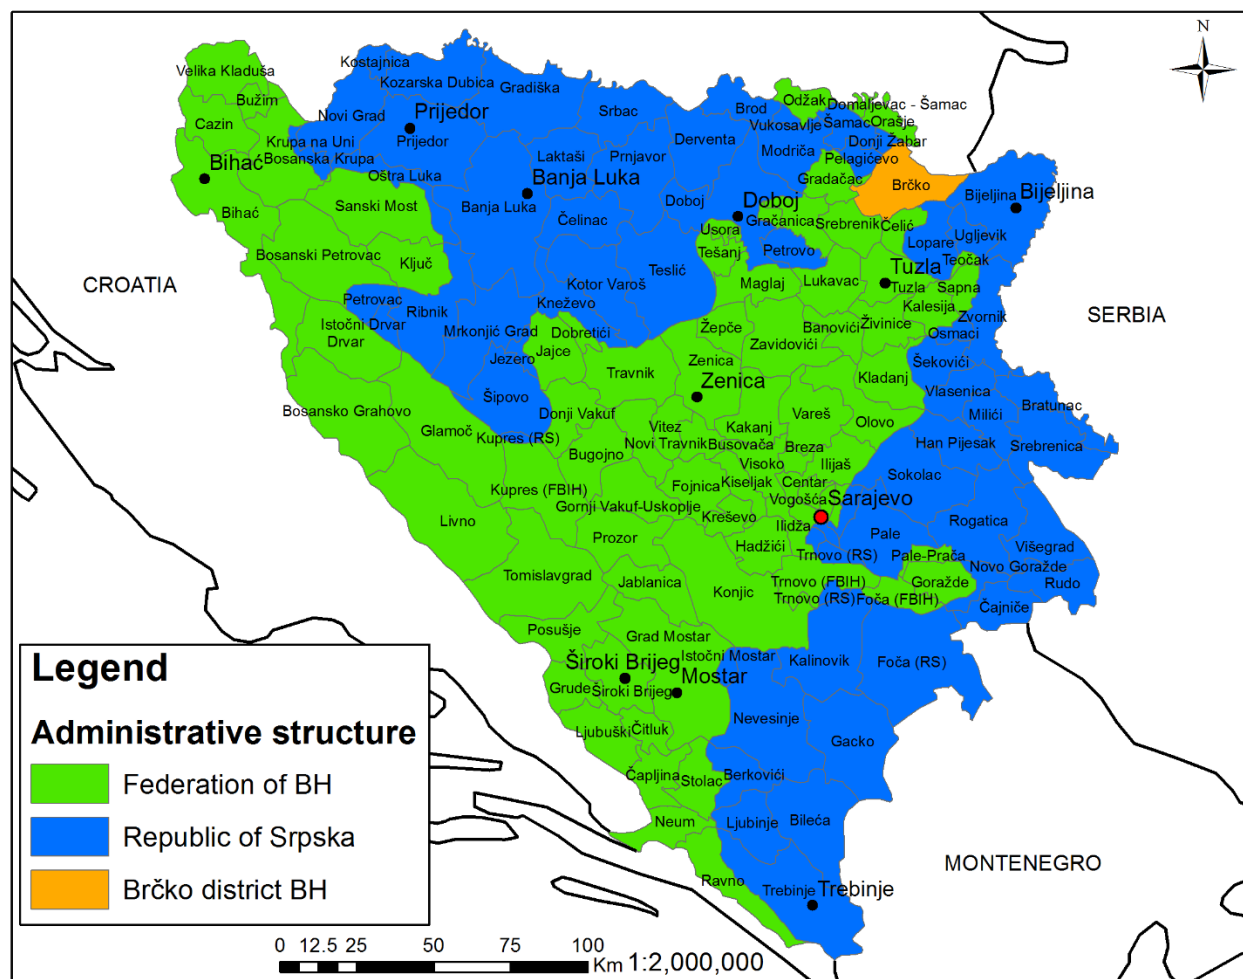

**Supplementary Figure S1.** Administrative structure and municipalities of Bosnia and Herzegovina

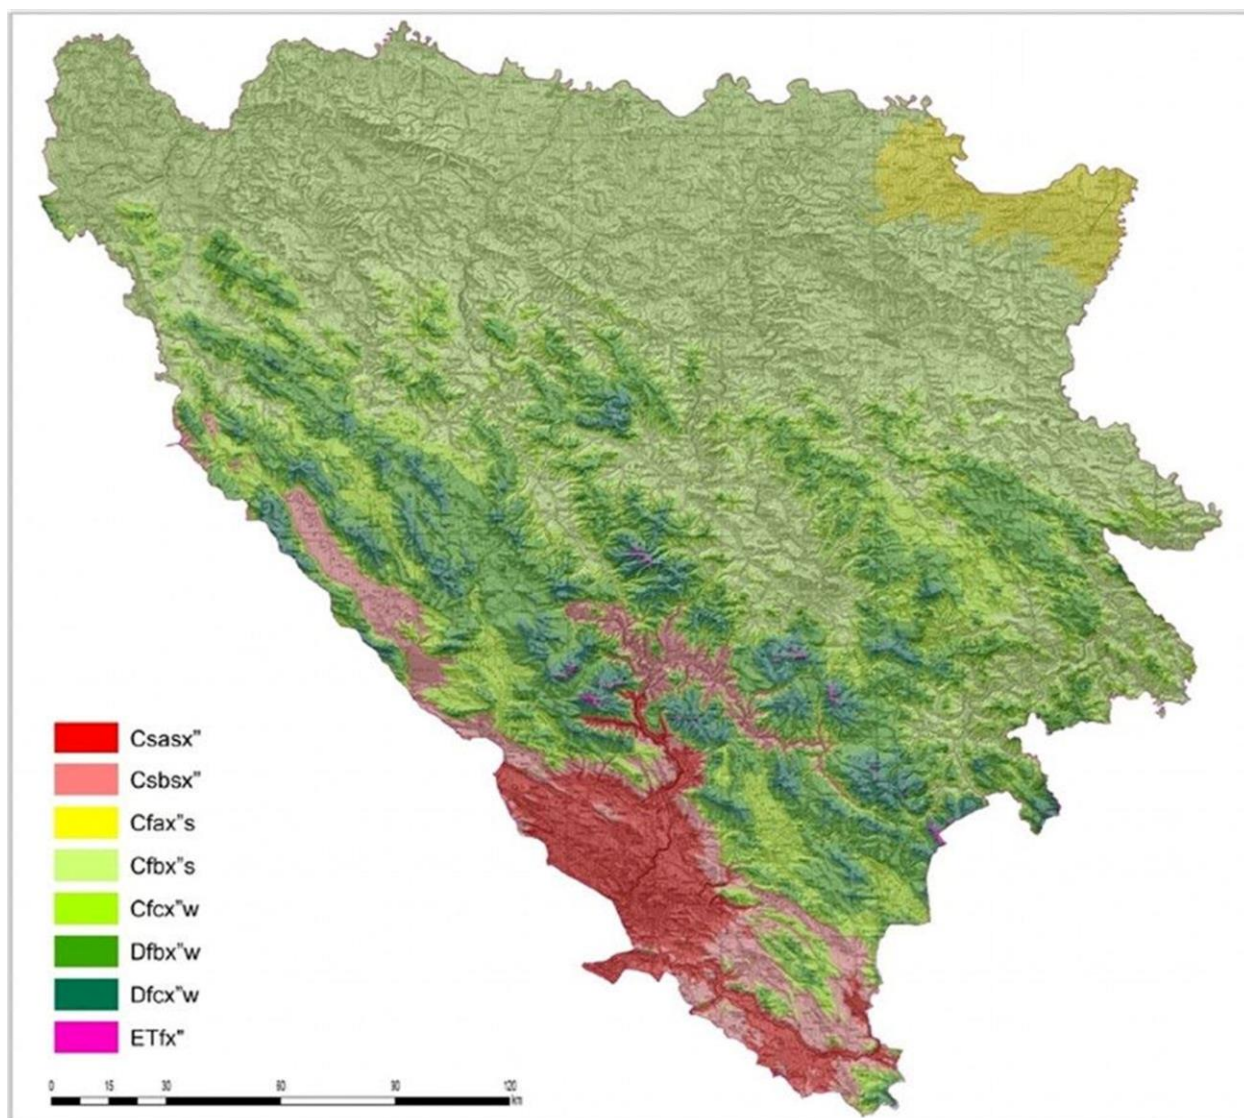

**Supplementary Figure S2.** Climate zones of Bosnia and Herzegovina according to Köppen-Geiger climate classification

Csasx'' - mediterranean climate with the hot summers and summer dry periods

Csbsx'' - mediterranean climate with the warm summers and summer dry periods

Cfax''s - temperate warm and humid climate with hot summers and without dry periods

Cfbx''s - temperate warm and humid climate with warm summers and without dry periods

Cfcx''w - temperate warm and humid climate with fresh summers and without dry periods

Dfbx''w - snow-forest climate with warm summers and without dry periods

Dfcx''w - snow-forest climate with fresh summers and without dry periods

ETfx'' - tundra climate

**Supplementary Table S1.** Factor loadings for extracted principal components

| Factor                                  | Loading |
|-----------------------------------------|---------|
| Changes in average annual temperatures  | 0.36    |
| Changes in average annual precipitation | 0.32    |
| Frequency of extreme months (Z-index)   | 0.05    |
| Flood risk index                        | 0.22    |
| Soil depth                              | 0.08    |
| % of agricultural land                  | -0.09   |
| % of agricultural households            | -0.02   |
| % of rural population                   | 0.28    |
| Agricultural land per capita            | 0.19    |
| Population density                      | -0.28   |
| Unemployment rate                       | -0.10   |
| GDP Per capita                          | 0.05    |
| Dependency ratio                        | -0.03   |
| Literacy rate                           | -0.17   |
| % of population with higher education   | -0.08   |
| Schools per 1000 population             | -0.08   |
| Doctors per 1000 population             | 0.06    |
| Road length per km <sup>2</sup>         | 0.43    |
| Total social capital                    | 0.13    |
| Average yield (major crops)             | 0.61    |
